# Supplementary material for: TOP2A, GGH, and PECAM1 are associated with hematogenous, lymph node, and peritoneal recurrence in stage II/III gastric cancer patients enrolled in the ACTS-GC study
Source: PubMed Central journal article supplement (PMC5593668; doi:10.18632/oncotarget.15895), 2017-03-04
Supplement: oncotarget-08-57574-s001.pdf [file oncotarget-08-57574-s001.pdf]

# TOP2A, GGH, and PECAM1 are associated with hematogenous, lymph node, and peritoneal recurrence in stage II/III gastric cancer patients enrolled in the ACTS-GC study

## Supplementary Materials

### Site of Relapse: 5-year Cumulative Recurrence Rate (ACTS-GC BM)

(All randomized)

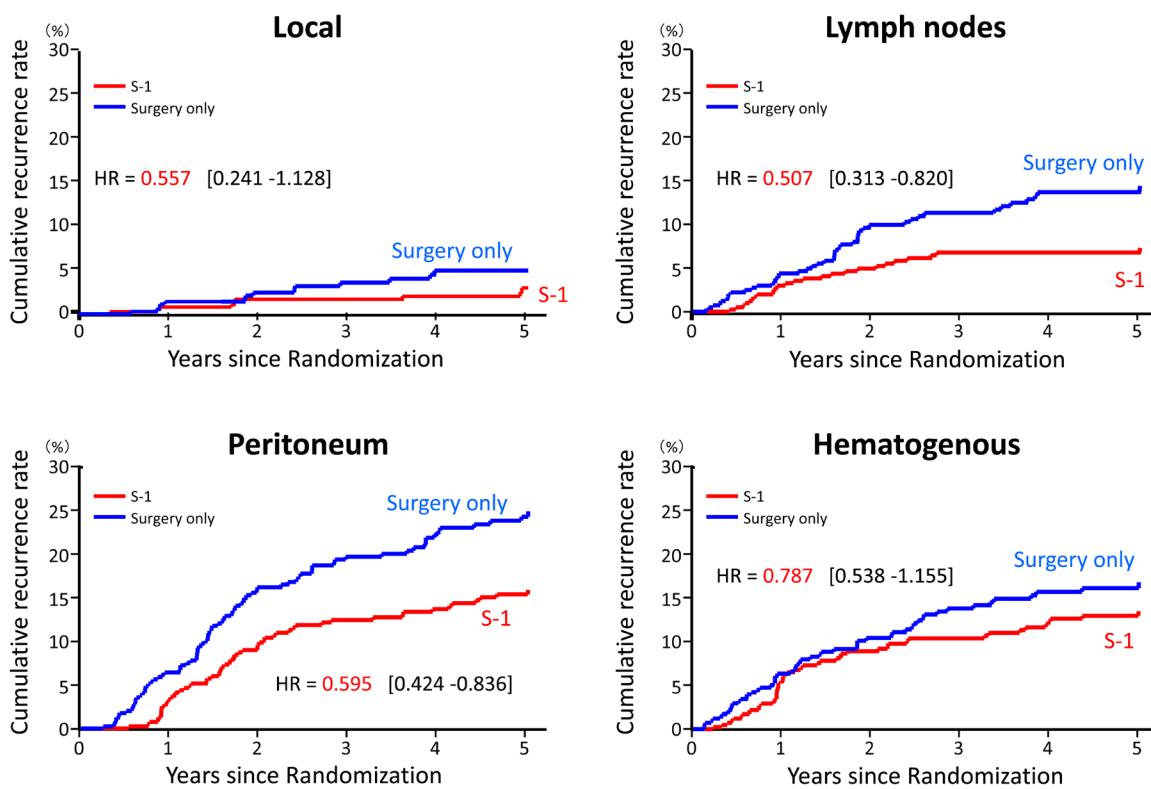

**Figure S1.** Site of relapse: 5-year cumulative recurrence rate.

## Hazard ratios and 95% CIs for each site of first recurrence

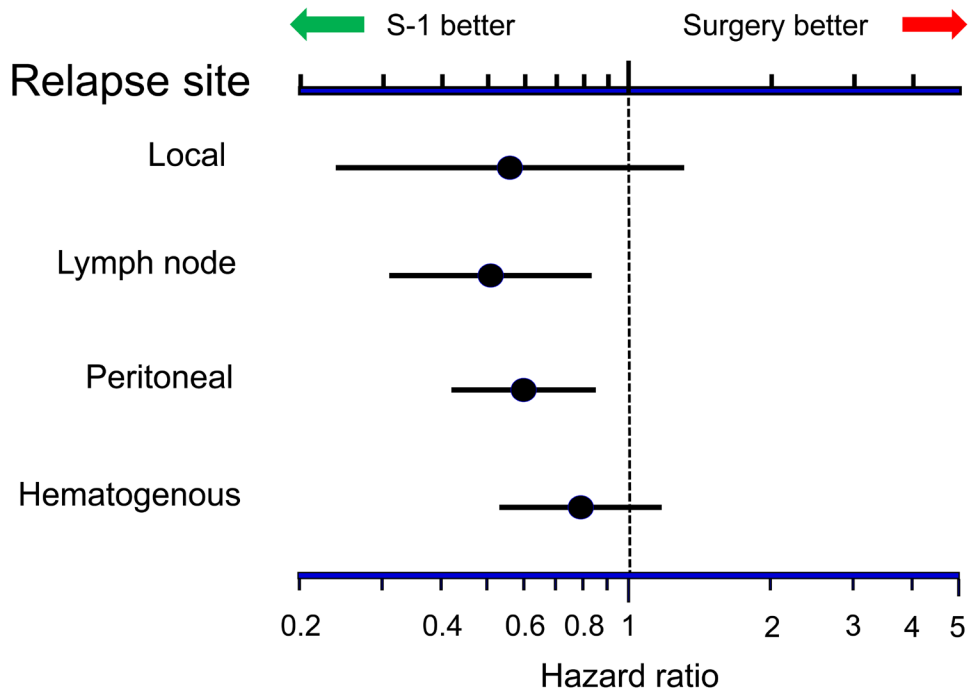

**Figure S2.** Hazard ratios (HR) and 95% confidence intervals (CIs) for each site of first recurrence.

**Table S1:** Clinicopathological characteristics of the

## Clinicopathologic characteristics of the patients

|                              | S-1<br>(N=415) | Surgery Only<br>(N=414) | P Value |
|------------------------------|----------------|-------------------------|---------|
| <b>Sex - no. (%)</b>         |                |                         | 0.900   |
| Male                         | 282 (68)       | 283 (68)                |         |
| Female                       | 133 (32)       | 131 (32)                |         |
| <b>Age</b>                   |                |                         | 0.715   |
| <60 yr - no. (%)             | 160 (39)       | 158 (38)                |         |
| 60-69 yr - no. (%)           | 149 (36)       | 161 (39)                |         |
| 70-80 yr - no. (%)           | 106 (26)       | 95 (23)                 |         |
| Median yr                    | 63             | 62                      |         |
| Range - yr                   | 27 - 80        | 33 - 80                 |         |
| <b>Tumor stage - no. (%)</b> |                |                         | 0.925   |
| T1                           | 1 (0)          | 0 (0)                   |         |
| T2                           | 222 (53)       | 223 (54)                |         |
| T3                           | 180 (43)       | 182 (44)                |         |
| T4                           | 12 (3)         | 9 (2)                   |         |
| <b>Nodal stage - no. (%)</b> |                |                         | 0.523   |
| N0                           | 40 (10)        | 52 (13)                 |         |
| N1                           | 233 (56)       | 222 (54)                |         |
| N2                           | 142 (34)       | 140 (34)                |         |
| N3                           | 0 (0)          | 0 (0)                   |         |

  

|                                        | S-1<br>(N=415) | Surgery Only<br>(N=414) | P Value |
|----------------------------------------|----------------|-------------------------|---------|
| <b>Lymph-node metastases - no. (%)</b> |                |                         | 0.175   |
| 0                                      | 40 (10)        | 52 (13)                 |         |
| 1-6                                    | 254 (61)       | 254 (61)                |         |
| 7-15                                   | 97 (23)        | 85 (21)                 |         |
| >16                                    | 24 (6)         | 23 (6)                  |         |
| <b>Cancer stage - no. (%)</b>          |                |                         | 0.480   |
| II                                     | 183 (44)       | 189 (46)                |         |
| IIIa                                   | 159 (38)       | 162 (39)                |         |
| IIIb                                   | 73 (18)        | 63 (15)                 |         |
| IV                                     | 0 (0)          | 0 (0)                   |         |
| <b>Histologic type - no. (%)</b>       |                |                         | 0.977   |
| Differentiated                         | 166 (40)       | 166 (40)                |         |
| Undifferentiated                       | 249 (60)       | 248 (60)                |         |

Cancer stage was categorized according to Japanese classification

**Table S2.** Univariate analysis of risk for local recurrence

| Local recurrence |       |               |            |       |
|------------------|-------|---------------|------------|-------|
| Gene             | H.R.  | 95% CI        | Log-Rank P | FDR   |
| <i>E2F1</i>      | 3.021 | 1.098 - 8.313 | 0.024      | 0.814 |
| <i>ITGB3</i>     | 0.435 | 0.179 - 1.057 | 0.058      | 0.814 |
| <i>EREG</i>      | 0.408 | 0.144 - 1.157 | 0.081      | 0.814 |
| <i>AREG</i>      | 0.482 | 0.204 - 1.136 | 0.088      | 0.814 |
| <i>GZMA</i>      | 0.464 | 0.187 - 1.151 | 0.090      | 0.814 |
| <i>ESR1</i>      | 0.469 | 0.189 - 1.162 | 0.094      | 0.814 |
| <i>PTGS2</i>     | 0.501 | 0.212 - 1.181 | 0.107      | 0.814 |
| <i>HDAC1</i>     | 0.545 | 0.231 - 1.286 | 0.159      | 0.814 |
| <i>DPYD</i>      | 0.547 | 0.232 - 1.290 | 0.162      | 0.814 |
| <i>MGMT</i>      | 0.565 | 0.237 - 1.348 | 0.192      | 0.814 |
| <i>ABCB1</i>     | 0.566 | 0.238 - 1.350 | 0.194      | 0.814 |
| <i>TYMP</i>      | 0.596 | 0.258 - 1.377 | 0.220      | 0.814 |
| <i>PTEN</i>      | 0.602 | 0.260 - 1.390 | 0.229      | 0.814 |
| <i>RUNX3</i>     | 0.611 | 0.265 - 1.413 | 0.245      | 0.814 |
| <i>SPARC</i>     | 1.634 | 0.707 - 3.775 | 0.246      | 0.814 |
| <i>BAX</i>       | 0.646 | 0.280 - 1.493 | 0.303      | 0.814 |
| <i>FAS</i>       | 0.648 | 0.277 - 1.517 | 0.314      | 0.814 |
| <i>BCL2L11</i>   | 0.598 | 0.217 - 1.646 | 0.314      | 0.814 |
| <i>VEGFA</i>     | 0.660 | 0.285 - 1.524 | 0.327      | 0.814 |
| <i>ERBB2</i>     | 1.494 | 0.655 - 3.408 | 0.337      | 0.814 |
| <i>BCL2</i>      | 0.653 | 0.267 - 1.597 | 0.346      | 0.814 |
| <i>UMPS</i>      | 0.675 | 0.288 - 1.578 | 0.361      | 0.814 |
| <i>EGFR</i>      | 0.686 | 0.297 - 1.586 | 0.375      | 0.814 |
| <i>LRP5</i>      | 0.701 | 0.304 - 1.621 | 0.404      | 0.814 |
| <i>UPP1</i>      | 0.717 | 0.314 - 1.635 | 0.427      | 0.814 |
| <i>TOP1</i>      | 0.732 | 0.321 - 1.670 | 0.457      | 0.814 |
| <i>REG4</i>      | 0.723 | 0.305 - 1.716 | 0.460      | 0.814 |
| <i>IGF1R</i>     | 0.731 | 0.316 - 1.688 | 0.461      | 0.814 |
| <i>ABCC1</i>     | 1.358 | 0.596 - 3.098 | 0.465      | 0.814 |
| <i>ERCC1</i>     | 1.354 | 0.594 - 3.089 | 0.469      | 0.814 |
| <i>VCAM1</i>     | 0.744 | 0.326 - 1.697 | 0.481      | 0.814 |
| <i>DUT</i>       | 0.756 | 0.331 - 1.724 | 0.505      | 0.814 |
| <i>RRM2</i>      | 0.765 | 0.335 - 1.745 | 0.524      | 0.814 |
| <i>TYMS</i>      | 1.285 | 0.564 - 2.931 | 0.550      | 0.814 |
| <i>CAV1</i>      | 0.785 | 0.344 - 1.791 | 0.565      | 0.814 |
| <i>PLAU</i>      | 1.270 | 0.557 - 2.897 | 0.569      | 0.814 |
| <i>GADD45A</i>   | 1.323 | 0.493 - 3.554 | 0.577      | 0.814 |
| <i>MLH1</i>      | 0.789 | 0.341 - 1.826 | 0.579      | 0.814 |
| <i>PECAM1</i>    | 0.794 | 0.348 - 1.812 | 0.584      | 0.814 |
| <i>EZH2</i>      | 1.255 | 0.529 - 2.981 | 0.605      | 0.814 |
| <i>MTHFR</i>     | 0.804 | 0.347 - 1.860 | 0.608      | 0.814 |
| <i>THBS1</i>     | 0.814 | 0.357 - 1.857 | 0.625      | 0.814 |
| <i>TOP2A</i>     | 0.814 | 0.357 - 1.858 | 0.625      | 0.814 |
| <i>MUC2</i>      | 1.173 | 0.463 - 2.972 | 0.736      | 0.886 |
| <i>GGH</i>       | 1.149 | 0.507 - 2.604 | 0.739      | 0.886 |
| <i>LDHA</i>      | 0.886 | 0.391 - 2.008 | 0.772      | 0.886 |
| <i>FPGS</i>      | 1.126 | 0.497 - 2.552 | 0.776      | 0.886 |
| <i>DHFR</i>      | 0.892 | 0.394 - 2.021 | 0.784      | 0.886 |
| <i>TGFA</i>      | 0.891 | 0.385 - 2.063 | 0.787      | 0.886 |
| <i>MAPT</i>      | 0.893 | 0.386 - 2.068 | 0.792      | 0.886 |
| <i>APC</i>       | 0.911 | 0.402 - 2.065 | 0.823      | 0.886 |
| <i>HPSE</i>      | 1.071 | 0.473 - 2.428 | 0.869      | 0.886 |
| <i>PLA2G2A</i>   | 1.081 | 0.417 - 2.801 | 0.873      | 0.886 |
| <i>ANGPT2</i>    | 1.071 | 0.464 - 2.470 | 0.873      | 0.886 |
| <i>RRM1</i>      | 0.942 | 0.415 - 2.134 | 0.885      | 0.886 |
| <i>DAPK1</i>     | 0.939 | 0.399 - 2.211 | 0.886      | 0.886 |

**Table S3.** Multivariate analysis of peritoneal recurrence

**Peritoneum recurrence**

| Group     | Status           | N   | Hazard Ratio (95% CI)  | P-value   |
|-----------|------------------|-----|------------------------|-----------|
| Arm       | Surgery Only     | 413 | 1                      | 0.0006    |
|           | S-1              | 415 | 0.553 [0.392 - 0.776 ] |           |
| SEX       | Female           | 264 | 1                      | 0.3385    |
|           | Male             | 564 | 0.843 [0.598 - 1.198 ] |           |
| Stage     | II               | 371 | 1                      | 0.0000002 |
|           | IIIa             | 321 | 1.822 [1.46 - 2.274 ]  |           |
|           | IIIb             | 136 | 3.319 [2.131 - 5.169 ] |           |
| Histology | Diffrentiated    | 493 | 1                      | 0.0038    |
|           | Undifferentiated | 332 | 1.806 [1.204 - 2.789 ] |           |
| PECAM1    | Low              | 412 | 1                      | 0.0002    |
|           | High             | 413 | 1.962 [1.367 - 2.864 ] |           |

**Table S4.** Multivariate analysis of lymph-node recurrence

**Lymph-node recurrence**

| Group     | Status           | N   | Hazard Ratio (95% CI)  | P-value |
|-----------|------------------|-----|------------------------|---------|
| Arm       | Surgery Only     | 384 | 1                      | 0.0020  |
|           | S-1              | 391 | 0.462 [0.274 - 0.757 ] |         |
| SEX       | Female           | 240 | 1                      | 0.9342  |
|           | Male             | 535 | 1.024 [0.598 - 1.828 ] |         |
| Stage     | II               | 353 | 1                      | 0.0002  |
|           | IIIa             | 296 | 1.868 [1.351 - 2.578 ] |         |
|           | IIIb             | 126 | 3.488 [1.824 - 6.644 ] |         |
| Histology | Diffrentiated    | 460 | 1                      | 0.0825  |
|           | Undifferentiated | 312 | 0.641 [0.386 - 1.059 ] |         |
| GGH       | Low              | 386 | 1                      | 0.0226  |
|           | High             | 386 | 1.803 [1.085 - 3.063 ] |         |

**Table S5.** Multivariate analysis of hematogenous recurrence

**Hematogenous recurrence**

| Group     | Status           | N   | Hazard Ratio (95% CI)  | P-value  |
|-----------|------------------|-----|------------------------|----------|
| Arm       | Surgery Only     | 413 | 1                      | 0.181044 |
|           | S-1              | 412 | 0.766 [0.517 - 1.132 ] |          |
| SEX       | Female           | 261 | 1                      | 0.798046 |
|           | Male             | 564 | 1.061 [0.683 - 1.694 ] |          |
| Stage     | II               | 371 | 1                      | 0.000003 |
|           | IIIa             | 319 | 1.868 [1.44 - 2.421 ]  |          |
|           | IIIb             | 135 | 3.489 [2.073 - 5.863 ] |          |
| Histology | Diffrentiated    | 490 | 1                      | 0.261429 |
|           | Undifferentiated | 332 | 0.789 [0.521 - 1.193 ] |          |
| TOP2A     | Low              | 411 | 1                      | 0.000213 |
|           | High             | 411 | 2.245 [1.455 - 3.541 ] |          |

**Table S6.** Correlation matrix Table (Pearson's correlation coefficient)

**Table S7.** Subgroup analyses according to the disease stage

**Table S8.** Subgroup analyses according to the intervension

**Table S9.** The interaction for site-specific recurrence between the gene expression and treatment arm.

**Table S10.** Assay IDs used in the Low-density array hyperlinked to DAVID website

**For Supplementary Tables S6-S10 see Supplementary Files: Supplementary Tables S6-S10**
